# Supplementary material
Source: PubMed Central journal article supplement (PMC3878158)
Supplement: NIHMS533570-supplement-Supplementary.pdf [file NIHMS533570-supplement-Supplementary.pdf]

**Supplemental Table 1.** Distribution of distance between each subjects and the nearest monitoring station.

|                   | Mean (SD)    | Median | IQR   |
|-------------------|--------------|--------|-------|
| CO                | 10.82 (5.82) | 10.31  | 8.64  |
| PM <sub>10</sub>  | 10.67 (5.79) | 10.49  | 8.94  |
| PM <sub>2.5</sub> | 12.18 (5.70) | 12.23  | 8.65  |
| NO <sub>2</sub>   | 13.20 (6.31) | 13.24  | 10.13 |
| O <sub>3</sub>    | 16.53 (8.09) | 15.32  | 11.03 |
| SO <sub>2</sub>   | 10.05 (5.50) | 9.71   | 8.79  |

**Supplemental Table 2.** Adjusted OR<sup>a</sup> with 95% CI for risk of HDP for per IQR increase in gestational exposure to pollutant in two-pollutant models among women who gave birth from 2004-2005 in Jacksonville, FL.

| Pair | Pollutant         | Trimester 1      | Trimester 2      | Entire pregnancy |
|------|-------------------|------------------|------------------|------------------|
| 1    | PM <sub>2.5</sub> | 1.11(0.99-1.25)  | 1.40(1.21-1.63)* | 1.25(1.08-1.44)* |
|      | NO <sub>2</sub>   | 1.15(1.01-1.30)* | 1.24(1.02-1.51)* | 1.21(1.09-1.35)* |
| 2    | SO <sub>2</sub>   | 1.12(1.01-1.24)* | 0.99(0.89-1.11)  | 1.13(1.02-1.26)* |
|      | NO <sub>2</sub>   | 1.11(0.78-1.26)  | 0.98(0.83-1.15)  | 1.22(1.10-1.35)* |
| 3    | CO                | 1.17(1.05-1.30)* | 1.06(0.95-1.18)  | 1.14(1.05-1.24)  |
|      | NO <sub>2</sub>   | 1.09(0.96-1.24)  | 1.00(0.85-1.19)  | 1.23(1.11-1.37)* |
| 4    | O <sub>3</sub>    | 0.97(0.81-1.16)  | 0.92(0.78-1.08)  | 0.91(0.70-0.94)* |
|      | NO <sub>2</sub>   | 1.14(1.01-1.29)* | 1.05(0.85-1.29)  | 1.34(1.18-1.51)* |
| 5    | SO <sub>2</sub>   | 1.12(1.01-1.24)* | 0.96(0.86-1.07)  | 1.09(0.97-1.21)  |
|      | PM <sub>2.5</sub> | 1.06(0.94-1.19)  | 1.30(1.14-1.47)* | 1.31(1.05-1.40)* |
| 6    | CO                | 1.17(1.05-1.30)* | 1.04(0.93-1.16)  | 1.11(1.02-1.21)* |
|      | PM <sub>2.5</sub> | 1.07(0.95-1.20)  | 1.28(1.13-1.45)* | 1.23(1.07-1.42)* |
| 7    | O <sub>3</sub>    | 1.05(0.87-1.26)  | 1.03(0.89-1.18)  | 0.96(0.85-1.09)  |
|      | PM <sub>2.5</sub> | 1.11(0.99-1.25)  | 1.30(1.13-1.48)* | 1.25(1.08-1.44)* |
| 8    | CO                | 1.17(1.05-1.30)* | 1.06(0.95-1.18)  | 1.11(1.02-1.20)* |
|      | SO <sub>2</sub>   | 1.11(1.01-1.23)* | 0.99(0.89-1.10)  | 1.11(1.00-1.23)* |
| 9    | O <sub>3</sub>    | 1.09(0.90-1.31)  | 0.93(0.81-1.07)  | 1.01(0.89-1.14)  |
|      | SO <sub>2</sub>   | 1.16(1.04-1.29)* | 0.98(0.88-1.09)  | 1.13(1.01-1.25)* |
| 10   | O <sub>3</sub>    | 1.14(0.94-1.38)  | 0.97(0.82-1.13)  | 1.07(0.93-1.22)  |
|      | CO                | 1.22(1.09-1.37)* | 1.04(0.92-1.18)  | 1.14(1.04-1.25)* |

<sup>a</sup> Adjusted for maternal age, race, education, marital status, smoking during pregnancy, season of conception, year of conception, prenatal care began, and tract median household income.

\* p<0.05

**Supplemental Table 3.** Stratified ORs for risk of HDP for an IQR increase in air pollution (NO<sub>2</sub>, PM<sub>10</sub>, PM<sub>2.5</sub>, SO<sub>2</sub>, CO, and O<sub>3</sub>) exposure by air pollutants and pregnancy period of exposure among women who gave birth from 2004-2005 in Jacksonville, FL.

| N (HDP)<br>N (No HDP)   | Non-Hispanic White        |                                      | Non-Hispanic Black        |                                      | Others                    |                                      |
|-------------------------|---------------------------|--------------------------------------|---------------------------|--------------------------------------|---------------------------|--------------------------------------|
|                         | Unadjusted OR<br>(95% CI) | Adjusted OR <sup>a</sup><br>(95% CI) | Unadjusted OR<br>(95% CI) | Adjusted OR <sup>a</sup><br>(95% CI) | Unadjusted OR<br>(95% CI) | Adjusted OR <sup>a</sup><br>(95% CI) |
|                         | 536<br>10787              |                                      | 404<br>7233               |                                      | 97<br>2984                |                                      |
| <i>NO<sub>2</sub></i>   |                           |                                      |                           |                                      |                           |                                      |
| Trimester 1             | 1.22(1.07-1.38)*          | 1.09(0.94-1.27)                      | 1.32(1.14-1.53)*          | 1.19(0.98-1.44)                      | 1.14(0.85-1.54)           | 1.24(0.87-1.78)                      |
| Trimester 2             | 1.04(0.90-1.21)           | 0.99(0.81-1.20)                      | 1.07(0.90-1.27)           | 1.02(0.80-1.29)                      | 0.85(0.59-1.21)           | 0.80(0.51-1.24)                      |
| Pregnancy               | 1.13(1.03-1.24)*          | 1.10(0.97-1.26)                      | 1.31(1.19-1.44)*          | 1.33(1.15-1.54)*                     | 1.26(1.03-1.54)*          | 1.47(1.14-1.89)*                     |
| <i>PM<sub>2.5</sub></i> |                           |                                      |                           |                                      |                           |                                      |
| Trimester 1             | 1.15(1.02-1.29)*          | 1.13(0.98-1.30)                      | 0.99(0.87-1.13)           | 1.03(0.87-1.23)                      | 1.27(0.96-1.68)           | 1.20(0.85-1.68)                      |
| Trimester 2             | 1.49(1.30-1.70)*          | 1.29(1.10-1.52)*                     | 1.43(1.23-1.67)*          | 1.16(0.94-1.43)                      | 2.05(1.48-2.83)*          | 1.80(1.20-2.71)*                     |
| Pregnancy               | 1.48(1.29-1.70)*          | 1.35(1.13-1.61)*                     | 1.18(1.01-1.39)*          | 1.00(0.80-1.26)                      | 1.89(1.35-2.64)*          | 1.59(1.04-2.44)*                     |
| <i>SO<sub>2</sub></i>   |                           |                                      |                           |                                      |                           |                                      |
| Trimester 1             | 1.19(1.07-1.34)*          | 1.14(1.00-1.30)*                     | 1.20(1.05-1.37)*          | 1.14(0.96-1.36)                      | 1.10(0.84-1.42)           | 1.11(0.80-1.53)                      |
| Trimester 2             | 0.92(0.81-1.04)           | 0.99(0.86-1.14)                      | 0.91(0.79-1.05)           | 0.94(0.80-1.12)                      | 1.27(0.97-1.66)           | 1.26(0.92-1.73)                      |
| Pregnancy               | 1.07(0.95-1.21)           | 1.17(1.02-1.35)*                     | 0.98(0.84-1.14)           | 1.01(0.85-1.22)                      | 1.27(0.95-1.69)           | 1.27(0.90-1.78)                      |
| <i>CO</i>               |                           |                                      |                           |                                      |                           |                                      |
| Trimester 1             | 1.09(0.97-1.22)           | 1.15(0.99-1.33)                      | 1.09(0.99-1.20)           | 1.20(1.05-1.36)*                     | 0.99(0.74-1.34)           | 1.33(0.96-1.84)                      |
| Trimester 2             | 0.86(0.76-0.98)*          | 1.00(0.86-1.17)                      | 0.95(0.86-1.05)           | 1.10(0.96-1.25)                      | 0.86(0.63-1.19)           | 1.12(0.79-1.60)                      |
| Pregnancy               | 0.93(0.84-1.03)           | 1.09(0.96-1.24)                      | 0.97(0.90-1.05)           | 1.12(1.01-1.25)*                     | 0.88(0.67-1.15)           | 1.24(0.94-1.66)                      |
| <i>O<sub>3</sub></i>    |                           |                                      |                           |                                      |                           |                                      |
| Trimester 1             | 1.07(0.92-1.23)           | 1.02(0.83-1.25)                      | 1.01(0.86-1.19)           | 0.94(0.74-1.19)                      | 1.32(0.94-1.86)           | 1.11(0.73-1.71)                      |
| Trimester 2             | 1.14(1.00-1.30)*          | 1.00(0.85-1.17)                      | 1.11(0.95-1.30)           | 0.91(0.73-1.12)                      | 0.77(0.56-1.07)           | 0.68(0.46-1.01)                      |
| Pregnancy               | 1.24(1.11-1.40)*          | 1.00(0.86-1.17)                      | 1.24(1.10-1.40)*          | 0.95(0.80-1.14)                      | 1.22(0.91-1.63)           | 0.95(0.66-1.37)                      |

<sup>a</sup> Adjusted for maternal age, race, education, marital status, smoking during pregnancy, season of conception, year of conception, prenatal care began, and tract median household income.

\* p<0.05

**Supplemental Table 4.** Stratified ORs for risk of HDP for an IQR increase in air pollution (NO<sub>2</sub>, PM<sub>10</sub>, PM<sub>2.5</sub>, SO<sub>2</sub>, CO, and O<sub>3</sub>) exposure by air pollutants and pregnancy period of exposure among women who gave birth from 2004-2005 in Jacksonville, FL.

| N (HDP)<br>N (No HDP)   | Non-smoker       |                  | Smoker (<10 cigarettes/day) |                           | Smoker (≥10 cigarettes/day)          |                           |                                      |
|-------------------------|------------------|------------------|-----------------------------|---------------------------|--------------------------------------|---------------------------|--------------------------------------|
|                         | 954<br>18919     | 28<br>781        | 39<br>947                   | Unadjusted OR<br>(95% CI) | Adjusted OR <sup>a</sup><br>(95% CI) | Unadjusted OR<br>(95% CI) | Adjusted OR <sup>a</sup><br>(95% CI) |
| <i>NO<sub>2</sub></i>   |                  |                  |                             |                           |                                      |                           |                                      |
| Trimester 1             | 1.28(1.16-1.40)* | 1.16(1.02-1.31)* | 0.80(0.46-1.40)             | 0.73(0.37-1.47)           | 1.15(0.71-1.86)                      | 1.00(0.58-1.72)           |                                      |
| Trimester 2             | 1.03(0.93-1.16)  | 0.99(0.84-1.17)  | 1.59(0.82-3.12)             | 1.69(0.71-4.03)           | 0.77(0.45-1.33)                      | 0.59(0.32-1.10)           |                                      |
| Pregnancy               | 1.22(1.15-1.31)* | 1.23(1.10-1.37)* | 1.08(0.73-1.60)             | 1.07(0.63-1.83)           | 1.10(0.80-1.52)                      | 0.98(0.65-1.48)           |                                      |
| <i>PM<sub>2.5</sub></i> |                  |                  |                             |                           |                                      |                           |                                      |
| Trimester 1             | 1.11(1.02-1.21)* | 1.12(1.00-1.25)* | 0.93(0.58-1.50)             | 1.01(0.54-1.88)           | 0.98(0.63-1.52)                      | 0.82(0.51-1.32)           |                                      |
| Trimester 2             | 1.53(1.39-1.69)* | 1.27(1.12-1.45)* | 1.25(0.70-2.24)             | 1.20(0.54-2.63)           | 1.55(0.93-2.57)                      | 1.65(0.91-2.98)           |                                      |
| Pregnancy               | 1.43(1.28-1.58)  | 1.25(1.08-1.44)* | 1.17(0.65-2.11)             | 1.23(0.55-2.77)           | 1.29(0.76-2.18)                      | 1.13(0.60-2.13)           |                                      |
| <i>SO<sub>2</sub></i>   |                  |                  |                             |                           |                                      |                           |                                      |
| Trimester 1             | 1.19(1.09-1.30)* | 1.14(1.03-1.27)* | 1.40(0.87-2.26)             | 1.51(0.83-2.77)           | 1.17(0.76-1.78)                      | 0.82(0.50-1.34)           |                                      |
| Trimester 2             | 0.95(0.87-1.04)  | 0.99(0.89-1.11)  | 1.12(0.68-1.83)             | 0.96(0.52-1.77)           | 1.05(0.68-1.63)                      | 1.15(0.71-1.86)           |                                      |
| Pregnancy               | 1.06(0.96-1.16)  | 1.11(1.00-1.24)* | 1.45(0.86-2.42)             | 1.47(0.80-2.72)           | 1.27(0.82-1.99)                      | 1.26(0.77-2.06)           |                                      |
| <i>CO</i>               |                  |                  |                             |                           |                                      |                           |                                      |
| Trimester 1             | 1.14(1.06-1.22)* | 1.21(1.09-1.34)* | 0.96(0.62-1.51)             | 0.87(0.47-1.61)           | 0.87(0.60-1.26)                      | 0.92(0.60-1.41)           |                                      |
| Trimester 2             | 0.95(0.88-1.02)  | 1.06(0.95-1.18)  | 1.13(0.76-1.68)             | 1.15(0.69-1.91)           | 0.80(0.53-1.21)                      | 0.92(0.58-1.47)           |                                      |
| Pregnancy               | 1.00(0.94-1.06)  | 1.13(1.04-1.23)* | 0.98(0.69-1.38)             | 1.02(0.64-1.62)           | 0.83(0.60-1.15)                      | 0.94(0.65-1.38)           |                                      |
| <i>O<sub>3</sub></i>    |                  |                  |                             |                           |                                      |                           |                                      |
| Trimester 1             | 1.03(0.93-1.15)  | 0.99(0.83-1.18)  | 0.94(0.50-1.78)             | 0.87(0.39-1.94)           | 1.30(0.77-2.18)                      | 1.29(0.72-2.30)           |                                      |
| Trimester 2             | 1.08(0.97-1.19)  | 0.93(0.82-1.07)  | 1.05(0.60-1.85)             | 1.22(0.60-2.50)           | 1.16(0.71-1.89)                      | 0.89(0.51-1.55)           |                                      |
| Pregnancy               | 1.20(1.11-1.31)* | 0.99(0.87-1.11)  | 1.04(0.66-1.64)             | 0.92(0.51-1.69)           | 1.24(0.82-1.89)                      | 0.91(0.55-1.48)           |                                      |

<sup>a</sup> Adjusted for maternal age, race, education, marital status, smoking during pregnancy, season of conception, year of conception, prenatal care began, and tract median household income.

\* p<0.05

**Supplemental Table 5.** Stratified ORs for risk of HDP for an IQR increase in air pollution (NO<sub>2</sub>, PM<sub>10</sub>, PM<sub>2.5</sub>, SO<sub>2</sub>, CO, and O<sub>3</sub>) exposure by air pollutants and pregnancy period of exposure among women who gave birth from 2004-2005 in Jacksonville, FL.

| N (HDP)<br>N (No HDP)   | Gestational diabetes      |                                      | Non-gestational diabetes  |                                      |
|-------------------------|---------------------------|--------------------------------------|---------------------------|--------------------------------------|
|                         | Unadjusted OR<br>(95% CI) | Adjusted OR <sup>a</sup><br>(95% CI) | Unadjusted OR<br>(95% CI) | Adjusted OR <sup>b</sup><br>(95% CI) |
|                         |                           | 58<br>568                            |                           | 979<br>20436                         |
| <i>NO<sub>2</sub></i>   |                           |                                      |                           |                                      |
| Trimester 1             | 1.25(0.85-1.84)           | 1.27(0.77-2.11)                      | 1.25(1.14-1.37) *         | 1.13(0.99-1.28)                      |
| Trimester 2             | 0.99(0.64-1.52)           | 1.45(0.78-2.72)                      | 1.03(0.93-1.15)           | 0.94(0.80-1.12)                      |
| Pregnancy               | 1.02(0.76-1.35)           | 1.50(0.95-2.46)                      | 1.22(1.14-1.30) *         | 1.20(1.08-1.34) *                    |
| <i>PM<sub>2.5</sub></i> |                           |                                      |                           |                                      |
| Trimester 1             | 1.34(0.93-1.96)           | 1.53(0.96-2.50)                      | 1.08(0.99-1.18)           | 1.08(0.96-1.21)                      |
| Trimester 2             | 1.05(0.68-1.63)           | 1.05(0.65-1.69)                      | 1.54(1.39-1.70) *         | 1.31(1.15-1.49) *                    |
| Pregnancy               | 1.56(0.97-2.57)           | 1.45(0.82-2.64)                      | 1.39(1.25-1.54) *         | 1.23(1.06-1.42) *                    |
| <i>SO<sub>2</sub></i>   |                           |                                      |                           |                                      |
| Trimester 1             | 0.94(0.64-1.36)           | 1.08(0.71-1.63)                      | 1.20(1.11-1.31) *         | 1.14(1.03-1.27) *                    |
| Trimester 2             | 0.67(0.46-0.94) *         | 0.67(0.42-1.03)                      | 0.98(0.90-1.07)           | 1.03(0.92-1.15)                      |
| Pregnancy               | 0.73(0.49-1.06)           | 0.73(0.46-1.12)                      | 1.09(0.99-1.20)           | 1.16(1.04-1.30) *                    |
| <i>CO</i>               |                           |                                      |                           |                                      |
| Trimester 1             | 0.94(0.69-1.26)           | 1.15(0.76-1.72)                      | 1.13(1.05-1.21) *         | 1.19(1.06-1.32) *                    |
| Trimester 2             | 0.81(0.56-1.14)           | 0.76(0.46-1.21)                      | 0.96(0.89-1.03)           | 1.08(0.97-1.20)                      |
| Pregnancy               | 0.86(0.65-1.12)           | 0.86(0.59-1.22)                      | 1.00(0.94-1.06)           | 1.14(1.04-1.24) *                    |
| <i>O<sub>3</sub></i>    |                           |                                      |                           |                                      |
| Trimester 1             | 1.31(0.87-1.98)           | 1.09(0.56-2.20)                      | 1.03(0.93-1.14)           | 0.99(0.83-1.19)                      |
| Trimester 2             | 1.14(0.74-1.75)           | 1.18(0.68-2.01)                      | 1.07(0.97-1.18)           | 0.92(0.80-1.05)                      |
| Pregnancy               | 1.38(0.96-2.02)           | 1.53(0.92-2.61)                      | 1.19(1.10-1.29) *         | 0.95(0.85-1.08)                      |

<sup>a</sup> Adjusted for maternal age, race, education, marital status, season of conception, year of conception, prenatal care began, and tract median household income.

<sup>b</sup> Adjusted for maternal age, race, education, marital status, smoking during pregnancy (<10 or ≥10 cigarettes/day), season of conception, year of conception, prenatal care began, and tract median household income.

\* p<0.05

**Supplemental Table 6.** Stratified ORs for risk of HDP for an IQR increase in air pollution (NO<sub>2</sub>, PM<sub>10</sub>, PM<sub>2.5</sub>, SO<sub>2</sub>, CO, and O<sub>3</sub>) exposure by air pollutants and pregnancy period of exposure among women who gave birth from 2004-2005 in Jacksonville, FL.

| N (HDP)<br>N (No HDP)   | <High school     |                 | High school      |                           | >High school                         |                           |                                      |
|-------------------------|------------------|-----------------|------------------|---------------------------|--------------------------------------|---------------------------|--------------------------------------|
|                         | 155<br>3676      | 341<br>7085     | 526<br>10043     | Unadjusted OR<br>(95% CI) | Adjusted OR <sup>a</sup><br>(95% CI) | Unadjusted OR<br>(95% CI) | Adjusted OR <sup>a</sup><br>(95% CI) |
| <i>NO<sub>2</sub></i>   |                  |                 |                  |                           |                                      |                           |                                      |
| Trimester 1             | 1.23(0.97-1.55)  | 1.18(0.88-1.58) | 1.21(1.31-1.41)* | 1.09(0.89-1.33)           | 1.29(1.14-1.46)*                     | 1.15(0.99-1.35)           |                                      |
| Trimester 2             | 0.91(0.69-1.20)  | 0.88(0.62-1.24) | 1.08(0.90-1.30)  | 0.89(0.69-1.14)           | 1.05(0.90-1.22)                      | 1.06(0.87-1.28)           |                                      |
| Pregnancy               | 1.15(0.98-1.36)  | 1.22(0.98-1.53) | 1.21(1.09-1.35)* | 1.10(0.93-1.29)           | 1.23(1.13-1.34)*                     | 1.27(1.13-1.44)*          |                                      |
| <i>PM<sub>2.5</sub></i> |                  |                 |                  |                           |                                      |                           |                                      |
| Trimester 1             | 1.00(0.81-1.24)  | 1.08(0.83-1.39) | 0.99(0.86-1.13)  | 0.98(0.81-1.17)           | 1.20(1.07-1.35)*                     | 1.19(1.03-1.37)*          |                                      |
| Trimester 2             | 1.49(1.17-1.92)* | 1.16(0.83-1.62) | 1.56(1.32-1.84)* | 1.31(1.05-1.63)*          | 1.50(1.31-1.72)*                     | 1.30(1.10-1.54)*          |                                      |
| Pregnancy               | 1.29(1.00-1.68)* | 1.10(0.79-1.54) | 1.32(1.11-1.56)* | 1.18(0.93-1.49)           | 1.50(1.30-1.72)*                     | 1.32(1.10-1.58)*          |                                      |
| <i>SO<sub>2</sub></i>   |                  |                 |                  |                           |                                      |                           |                                      |
| Trimester 1             | 1.27(1.02-1.58)* | 1.10(0.83-1.46) | 1.15(1.00-1.33)* | 1.05(0.87-1.26)           | 1.21(1.08-1.35)*                     | 1.19(1.05-1.36)*          |                                      |
| Trimester 2             | 1.05(0.84-1.31)  | 1.09(0.83-1.42) | 0.95(0.82-1.10)  | 0.95(0.79-1.14)           | 0.93(0.83-1.05)                      | 1.00(0.87-1.14)           |                                      |
| Pregnancy               | 1.23(0.97-1.56)  | 1.26(0.96-1.67) | 1.05(0.90-1.23)  | 1.06(0.87-1.28)           | 1.04(0.91-1.18)                      | 1.13(0.99-1.30)           |                                      |
| <i>CO</i>               |                  |                 |                  |                           |                                      |                           |                                      |
| Trimester 1             | 1.02(0.87-1.20)  | 1.13(0.92-1.38) | 1.13(1.01-1.27)* | 1.09(0.93-1.27)           | 1.19(1.07-1.33)*                     | 1.29(1.13-1.48)*          |                                      |
| Trimester 2             | 0.98(0.83-1.15)  | 1.03(0.83-1.27) | 0.99(0.88-1.12)  | 1.06(0.91-1.25)           | 0.91(0.81-1.03)                      | 1.07(0.93-1.23)           |                                      |
| Pregnancy               | 0.96(0.84-1.10)  | 1.05(0.89-1.24) | 1.01(0.91-1.10)  | 1.08(0.95-1.23)           | 1.01(0.93-1.11)                      | 1.17(1.05-1.31)*          |                                      |
| <i>O<sub>3</sub></i>    |                  |                 |                  |                           |                                      |                           |                                      |
| Trimester 1             | 1.15(0.88-1.49)  | 1.03(0.73-1.45) | 1.05(0.88-1.26)  | 1.14(0.88-1.46)           | 1.01(0.87-1.17)                      | 0.92(0.75-1.13)           |                                      |
| Trimester 2             | 0.96(0.75-1.23)  | 0.91(0.67-1.23) | 0.99(0.84-1.18)  | 0.84(0.68-1.05)           | 1.15(1.01-1.31)*                     | 1.00(0.85-1.18)           |                                      |
| Pregnancy               | 1.17(0.96-1.42)  | 0.99(0.77-1.28) | 1.16(1.02-1.33)* | 0.94(0.78-1.13)           | 1.24(1.11-1.40)*                     | 1.00(0.86-1.17)           |                                      |

<sup>a</sup> Adjusted for maternal age, race, education, marital status, smoking during pregnancy, season of conception, year of conception, prenatal care began, and tract median household income.

\* p<0.05

**Supplemental Table 7.** Stratified ORs for risk of HDP for an IQR increase in air pollution (NO<sub>2</sub>, PM<sub>10</sub>, PM<sub>2.5</sub>, SO<sub>2</sub>, CO, and O<sub>3</sub>) exposure by air pollutants and pregnancy period of exposure among women who gave birth from 2004-2005 in Jacksonville, FL.

|                         | Distance ≤10 km           |                                      | Distance >10 km           |                                      |
|-------------------------|---------------------------|--------------------------------------|---------------------------|--------------------------------------|
|                         | Unadjusted OR<br>(95% CI) | Adjusted OR <sup>a</sup><br>(95% CI) | Unadjusted OR<br>(95% CI) | Adjusted OR <sup>a</sup><br>(95% CI) |
| <i>NO<sub>2</sub></i>   |                           |                                      |                           |                                      |
| Trimester 1             | 1.29(1.12-1.50)*          | 1.23(0.99-1.54)                      | 1.23(1.10-1.38)*          | 1.09(0.94-1.27)                      |
| Trimester 2             | 1.05(0.88-1.25)           | 0.99(0.74-1.30)                      | 1.03(0.90-1.17)           | 0.97(0.79-1.18)                      |
| Pregnancy               | 1.25(1.12-1.38)*          | 1.35(1.12-1.64)*                     | 1.19(1.10-1.29)*          | 1.15(1.01-1.30)*                     |
| <i>PM<sub>2.5</sub></i> |                           |                                      |                           |                                      |
| Trimester 1             | 1.20(1.04-1.39)*          | 1.18(0.98-1.42)                      | 1.04(0.94-1.15)           | 1.05(0.92-1.21)                      |
| Trimester 2             | 1.61(1.37-1.89)*          | 1.43(1.16-1.75)*                     | 1.46(1.30-1.65)*          | 1.20(1.02-1.41)*                     |
| Pregnancy               | 1.67(1.41-2.00)*          | 1.55(1.22-1.99)*                     | 1.28(1.13-1.45)*          | 1.10(0.92-1.30)                      |
| <i>SO<sub>2</sub></i>   |                           |                                      |                           |                                      |
| Trimester 1             | 1.23(1.10-1.37)*          | 1.17(1.02-1.34)*                     | 1.13(1.00-1.28)           | 1.08(0.92-1.25)                      |
| Trimester 2             | 0.92(0.82-1.03)           | 0.96(0.84-1.10)                      | 0.98(0.85-1.11)           | 1.00(0.83-1.20)                      |
| Pregnancy               | 1.06(0.94-1.20)           | 1.11(0.96-1.28)                      | 1.03(0.89-1.19)           | 1.12(0.94-1.33)                      |
| <i>CO</i>               |                           |                                      |                           |                                      |
| Trimester 1             | 1.06(0.97-1.16)           | 1.13(0.98-1.30)                      | 1.18(1.06-1.31)*          | 1.25(1.07-1.46)*                     |
| Trimester 2             | 0.90(0.82-0.99)           | 1.04(0.90-1.21)                      | 0.98(0.88-1.10)           | 1.08(0.92-1.25)                      |
| Pregnancy               | 0.93(0.86-1.00)           | 1.06(0.94-1.19)                      | 1.05(0.96-1.14)           | 1.19(1.05-1.34)*                     |
| <i>O<sub>3</sub></i>    |                           |                                      |                           |                                      |
| Trimester 1             | 1.02(0.81-1.29)           | 0.92(0.65-1.33)                      | 1.05(0.94-1.18)           | 1.02(0.84-1.25)                      |
| Trimester 2             | 1.23(0.99-1.53)           | 1.06(0.81-1.39)                      | 1.04(0.94-1.16)           | 0.91(0.78-1.05)                      |
| Pregnancy               | 1.25(1.04-1.52)*          | 1.01(0.79-1.32)                      | 1.20(1.10-1.31)*          | 0.97(0.85-1.11)                      |

<sup>a</sup> Adjusted for maternal age, race, education, marital status, smoking during pregnancy, season of conception, year of conception, prenatal care began, and tract median household income.

\* p<0.05
